# Supplementary material for: Synthesis and characterization of a green and recyclable arginine-based palladium/CoFe 2 O 4 nanomagnetic catalyst for efficient cyanation of aryl halides
Source: Royal Society of Chemistry journal article supplement (doi:10.1039/d4ra01200c), 2024-01-01
Supplement: d4ra01200c1.pdf [file d4ra01200c1.pdf]

## Synthesis and Characterization of a Green and Recyclable Arginine-based Palladium/CoFe<sub>2</sub>O<sub>4</sub> Nanomagnetic Catalyst for Efficient Cyanation of Aryl Halides

Sanaz HajimohamadzadehTorkambour<sup>a</sup>, Masoumeh Jadidi Nejad<sup>b</sup>, Farzane Pazoki<sup>a</sup>, Farzaneh Karimi<sup>a</sup>, and Akbar Heydari<sup>\*a</sup>

<sup>a</sup>Chemistry Department, Tarbiat Modares University, P.O. Box 14155-4838, Tehran, Iran.

<sup>b</sup>Department of Chemistry, Isfahan University of Technology, P.O. Box 84156-83111, Isfahan, Iran.

\*E-mail: heydar\_a@modares.ac.ir; Fax: +98-21-82883455; Tel: +98-21-82883444.

### Table of contents

|                                                                                       |            |
|---------------------------------------------------------------------------------------|------------|
| <b>1. Characterization of aryl nitrile derivatives</b>                                | <b>S1</b>  |
| <b>2. <sup>1</sup>H NMR and <sup>13</sup>CNMR spectra of aryl nitrile derivatives</b> | <b>S4</b>  |
| <b>3. References</b>                                                                  | <b>S21</b> |

### Characterization of aryl nitrile derivatives:

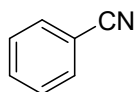

Benzonitrile (2a). Colorless oil; <sup>1</sup>H NMR (499 MHz, DMSO-d<sub>6</sub>) δ 7.81 (d, J = 7.6 Hz, 2H), 7.72-7.69 (m, 1H), 7.56 (t, J = 7.6 Hz, 2H); <sup>13</sup>C NMR (126 MHz, DMSO-d<sub>6</sub>) δ 132.62, 131.15, 128.77, 118.57, 112.64. HRMS (ESI): Calcd for C<sub>7</sub>H<sub>5</sub>N (M +H)<sup>+</sup> 103.04, found 103.09.

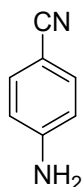

4-Aminobenzonitrile (2b). White solid, mp 83-85 °C; <sup>1</sup>H NMR (499 MHz, DMSO-d<sub>6</sub>) δ 7.38 (d, J = 8.1 Hz, 2H), 6.58 (d, J = 8.2 Hz, 2H), 6.12 (s, 2H); <sup>13</sup>C NMR (126 MHz, DMSO-d<sub>6</sub>) δ 151.00, 133.12, 118.44, 114.66, 98.60. HRMS (ESI): Calcd for C<sub>7</sub>H<sub>6</sub>N<sub>2</sub> (M +H)<sup>+</sup> 118.05, found 118.11.

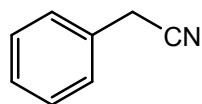

2-Phenylacetonitrile (2c). Colorless oil;  $^1\text{H}$  NMR (499 MHz, DMSO- $d_6$ )  $\delta$  7.39-7.31 (m, 2H), 7.31-7.25 (m, 3H), 3.71 (s, 2H);  $^{13}\text{C}$  NMR (126 MHz, DMSO- $d_6$ )  $\delta$  129.8, 129.0, 127.9, 127.8, 117.8, 23.4. HRMS (ESI): Calcd for  $\text{C}_8\text{H}_7\text{N}$  ( $\text{M} + \text{H}$ ) $^+$  117.06, found 117.11.

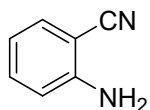

2-Aminobenzonitrile (2d). Beige-brown solid, mp 49-50 °C;  $^1\text{H}$  NMR (499 MHz, DMSO- $d_6$ )  $\delta$  7.35 (d,  $J = 7.9$  Hz, 1H), 7.28 (t,  $J = 7.5$  Hz, 1H), 6.76 (d,  $J = 8.5$  Hz, 1H), 6.57 (t,  $J = 7.5$  Hz, 1H), 5.98 (s, 2H);  $^{13}\text{C}$  NMR (126 MHz, DMSO- $d_6$ )  $\delta$  151.10, 133.59, 13.95, 118.01, 116.75, 115.05, 94.31. HRMS (ESI): Calcd for  $\text{C}_7\text{H}_6\text{N}_2$  ( $\text{M} + \text{H}$ ) $^+$  118.05, found 118.08.

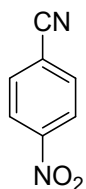

4-Nitrobenzonitrile (2e). Yellow solid, mp 147-149 °C;  $^1\text{H}$  NMR (499 MHz, DMSO- $d_6$ )  $\delta$  8.37 (d,  $J = 8.3$  Hz, 2H), 8.16 (d,  $J = 8.3$  Hz, 2H);  $^{13}\text{C}$  NMR (126 MHz, DMSO- $d_6$ )  $\delta$  15.01, 133.80, 123.92, 117.93, 117.07. HRMS (ESI): Calcd for  $\text{C}_7\text{H}_4\text{N}_2\text{O}_2$  ( $\text{M} + \text{H}$ ) $^+$  148.03, found 148.08.

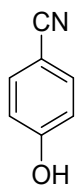

4-Hydroxybenzonitrile (2f). White solid, mp 110-112 °C;  $^1\text{H}$  NMR (499 MHz, DMSO- $d_6$ )  $\delta$  10.54 (s, 1H), 7.55 (d,  $J = 8.2$  Hz, 2H), 6.85 (d,  $J = 8.3$  Hz, 2H);  $^{13}\text{C}$  NMR (126 MHz, DMSO- $d_6$ )  $\delta$  161.80, 134.22, 118.56, 116.27, 102.33. HRMS (ESI): Calcd for  $\text{C}_7\text{H}_5\text{NO}$  ( $\text{M} + \text{H}$ ) $^+$  119.04, found 119.18.

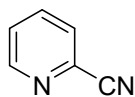

Picolinonitrile (2g). White solid, mp 28-30 °C;  $^1\text{H}$  NMR (499 MHz, DMSO- $d_6$ )  $\delta$  8.75 (d,  $J = 4.8$  Hz, 1H), 8.07-8.01 (m, 2H), 7.73 (t,  $J = 6.1$  Hz, 1H);  $^{13}\text{C}$  NMR (126 MHz, DMSO- $d_6$ )  $\delta$

151.37, 138.00, 133.98, 128.20, 127.66, 117.32. HRMS (ESI): Calcd for  $C_6H_4N_2$  (M + H)<sup>+</sup> 104.04, found 104.12.

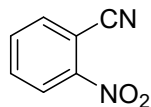

2-Nitrobenzonitrile (2h). Yellow solid, mp 109-110 °C; <sup>1</sup>H NMR (499 MHz, DMSO-d<sub>6</sub>) δ 8.42-8.35 (m, 1H), 8.17 (dd, J = 5.7, 3.4 Hz, 1H), 7.98 (dd, J = 6.0, 3.4 Hz, 2H); <sup>13</sup>C NMR (126 MHz, DMSO-d<sub>6</sub>) δ 149.39, 135.51, 134.36, 133.83, 124.14, 115.13, 107.96. HRMS (ESI): Calcd for  $C_7H_4N_2O_2$  (M + H)<sup>+</sup> 148.03, found 148.11.

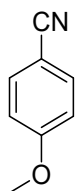

4-Methoxybenzonitrile (2i). White solid, mp 60-61 °C; <sup>1</sup>H NMR (499 MHz, DMSO-d<sub>6</sub>) δ 7.76 (d, J = 8.6 Hz, 2H), 7.09 (d, J = 8.6 Hz, 2H), 3.83 (s, 3H); <sup>13</sup>C NMR (126 MHz, DMSO-d<sub>6</sub>) δ 163.10, 133.88, 118.55, 114.22, 104.08, 55.32. HRMS (ESI): Calcd for  $C_{13}H_{13}N_2O$  (M + H)<sup>+</sup> 133.05, found 133.09.

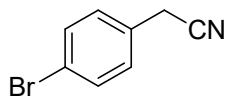

2-(4-bromophenyl)acetonitrile (2j). White solid, mp 48-50 °C; <sup>1</sup>H NMR (499 MHz, CDCl<sub>3</sub>) δ 7.54-7.47 (m, 2H), 7.21 (d, J = 8.5 Hz, 2H), 3.71 (s, 2H); <sup>13</sup>C NMR (126 MHz, DMSO-d<sub>6</sub>) δ 132.3, 129.6, 128.9, 122.2, 117.3, 23.2. HRMS (ESI): Calcd for  $C_8H_6BrN$  (M + H)<sup>+</sup> 194.97, found 195.03.

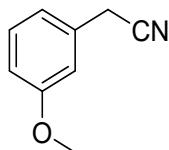

2-(3-methoxyphenyl)acetonitrile (2k). Yellow oil; <sup>1</sup>H NMR (499 MHz, CDCl<sub>3</sub>) δ 7.30-7.24 (m, 1H), 6.90-6.84 (m, 3H), 3.80 (s, 3H), 3.71 (s, 2H); <sup>13</sup>C NMR (126 MHz, DMSO-d<sub>6</sub>) δ 160.26, 131.40, 130.32, 120.28, 117.89, 113.74, 113.70, 55.47, 23.76. HRMS (ESI): Calcd for  $C_9H_9NO$  (M + H)<sup>+</sup> 147.07, found 147.13.

**$^1\text{H}$  NMR and  $^{13}\text{C}$  NMR spectra of aryl nitrile derivatives:**

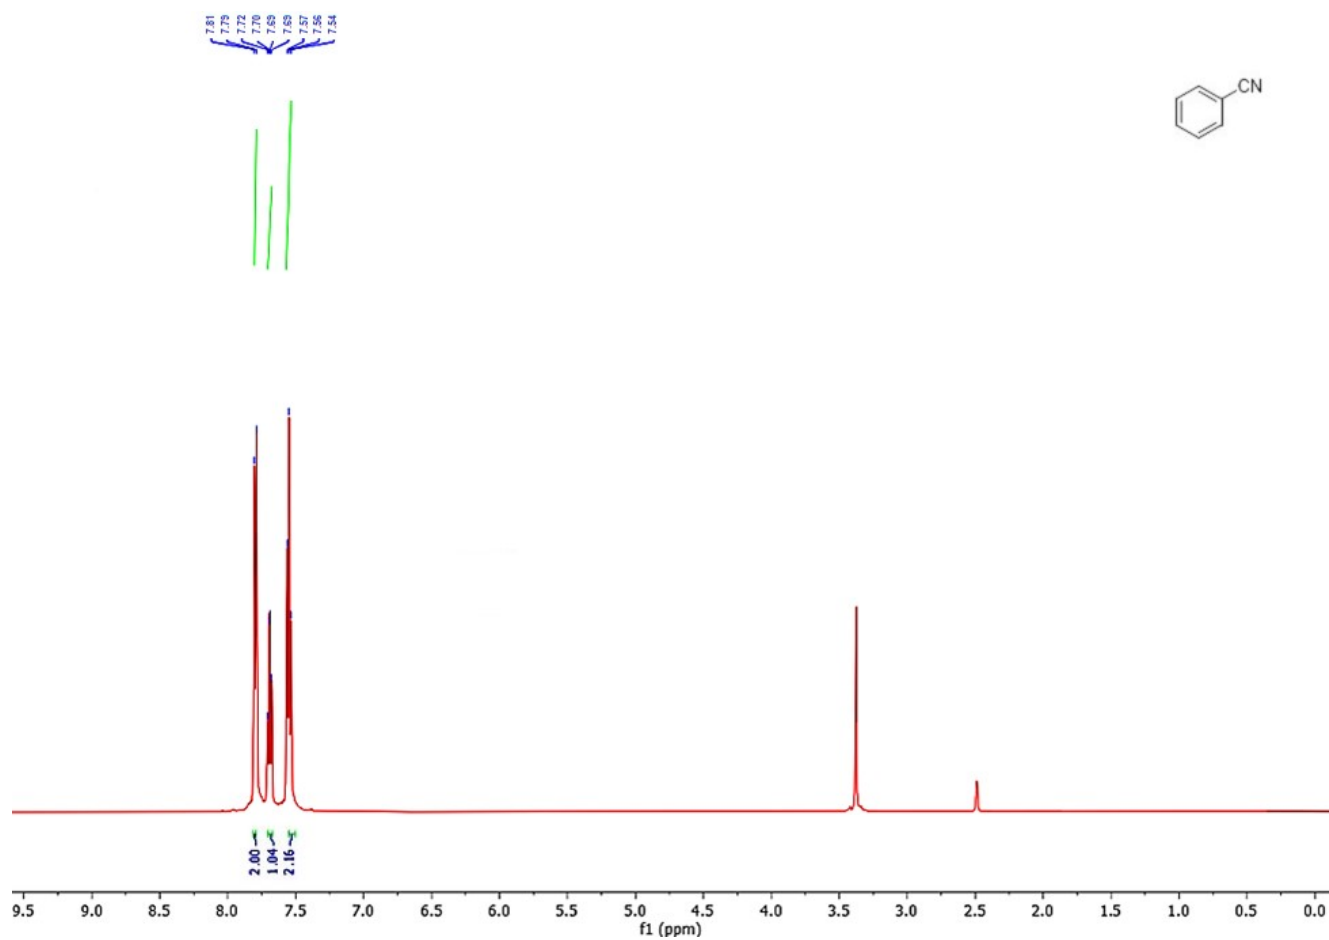

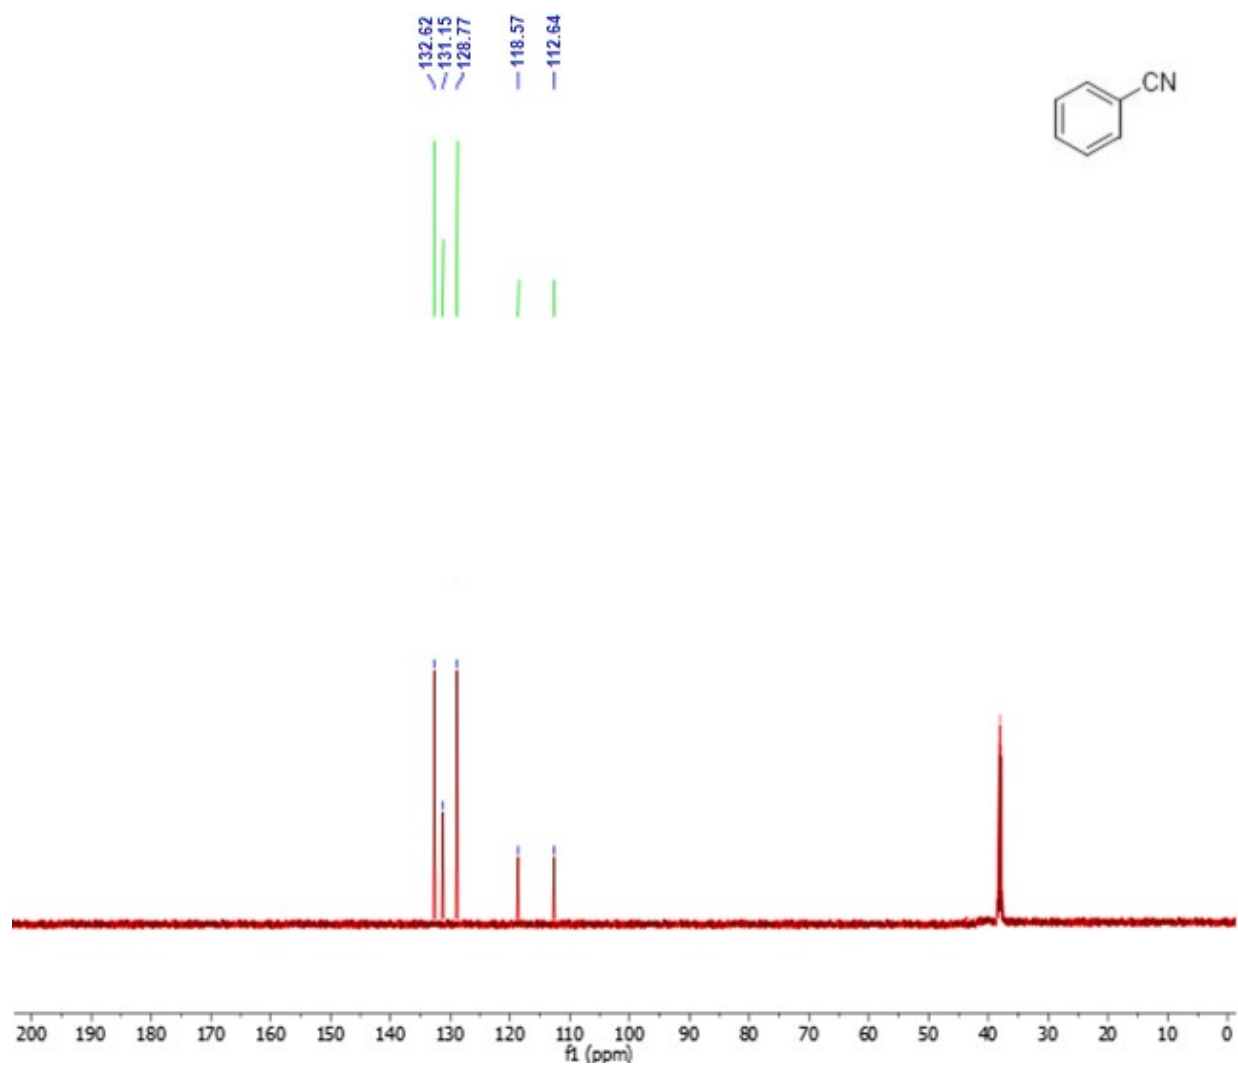

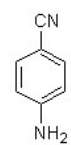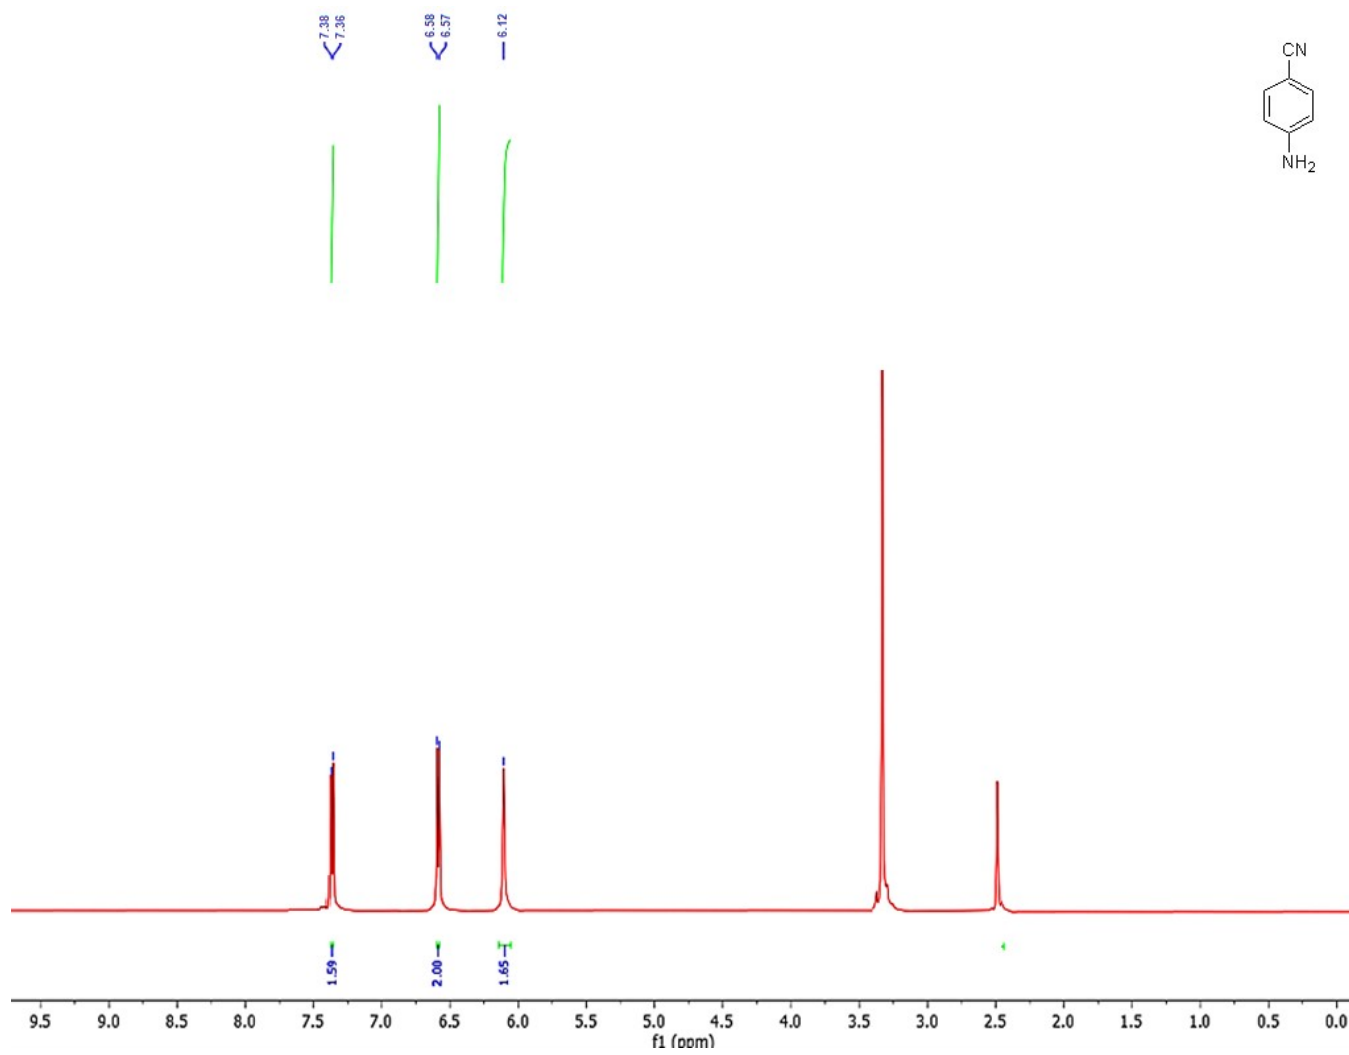

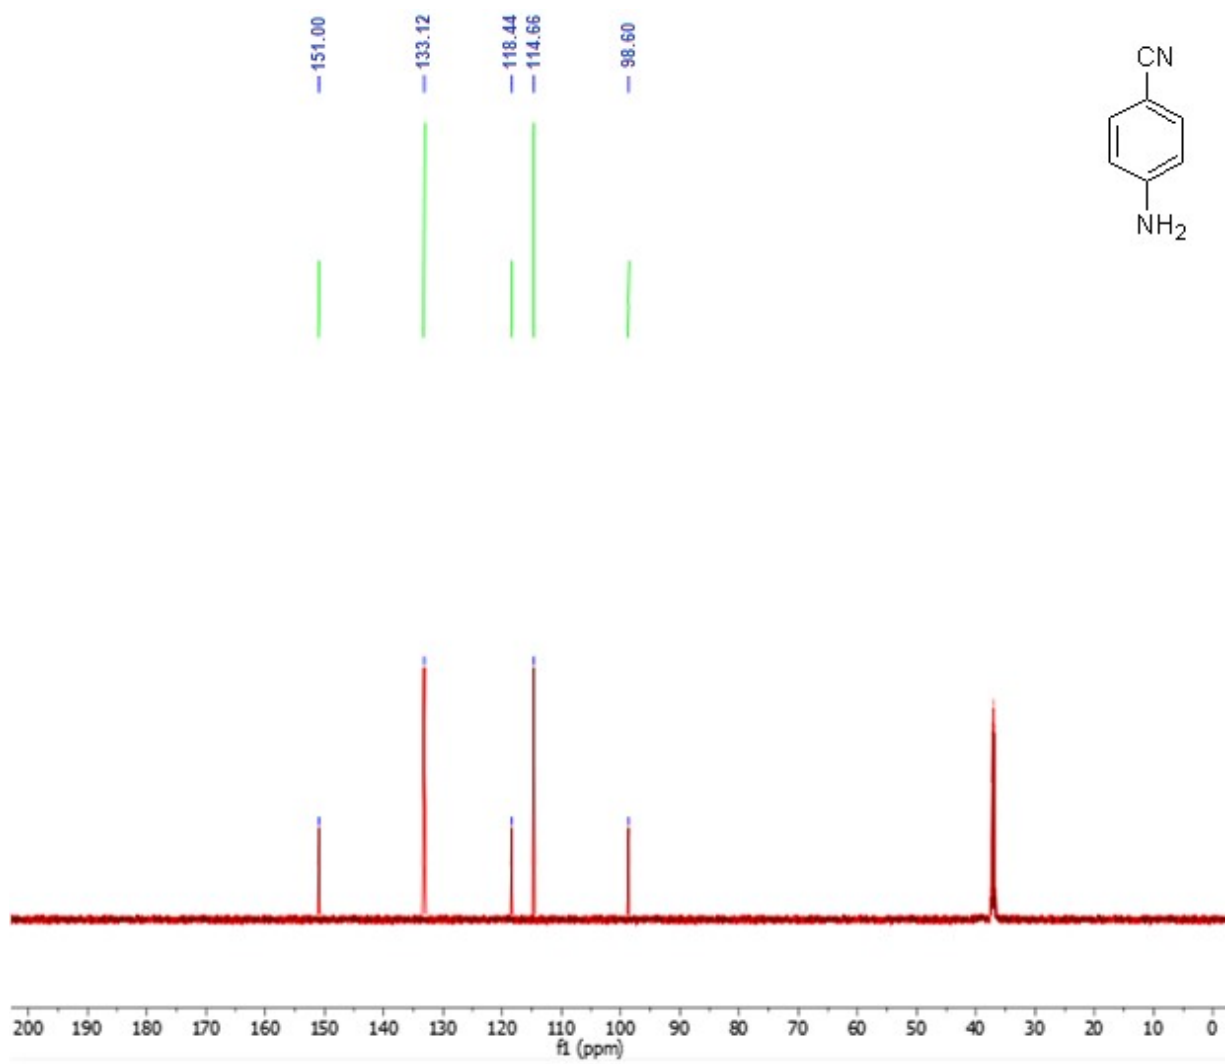

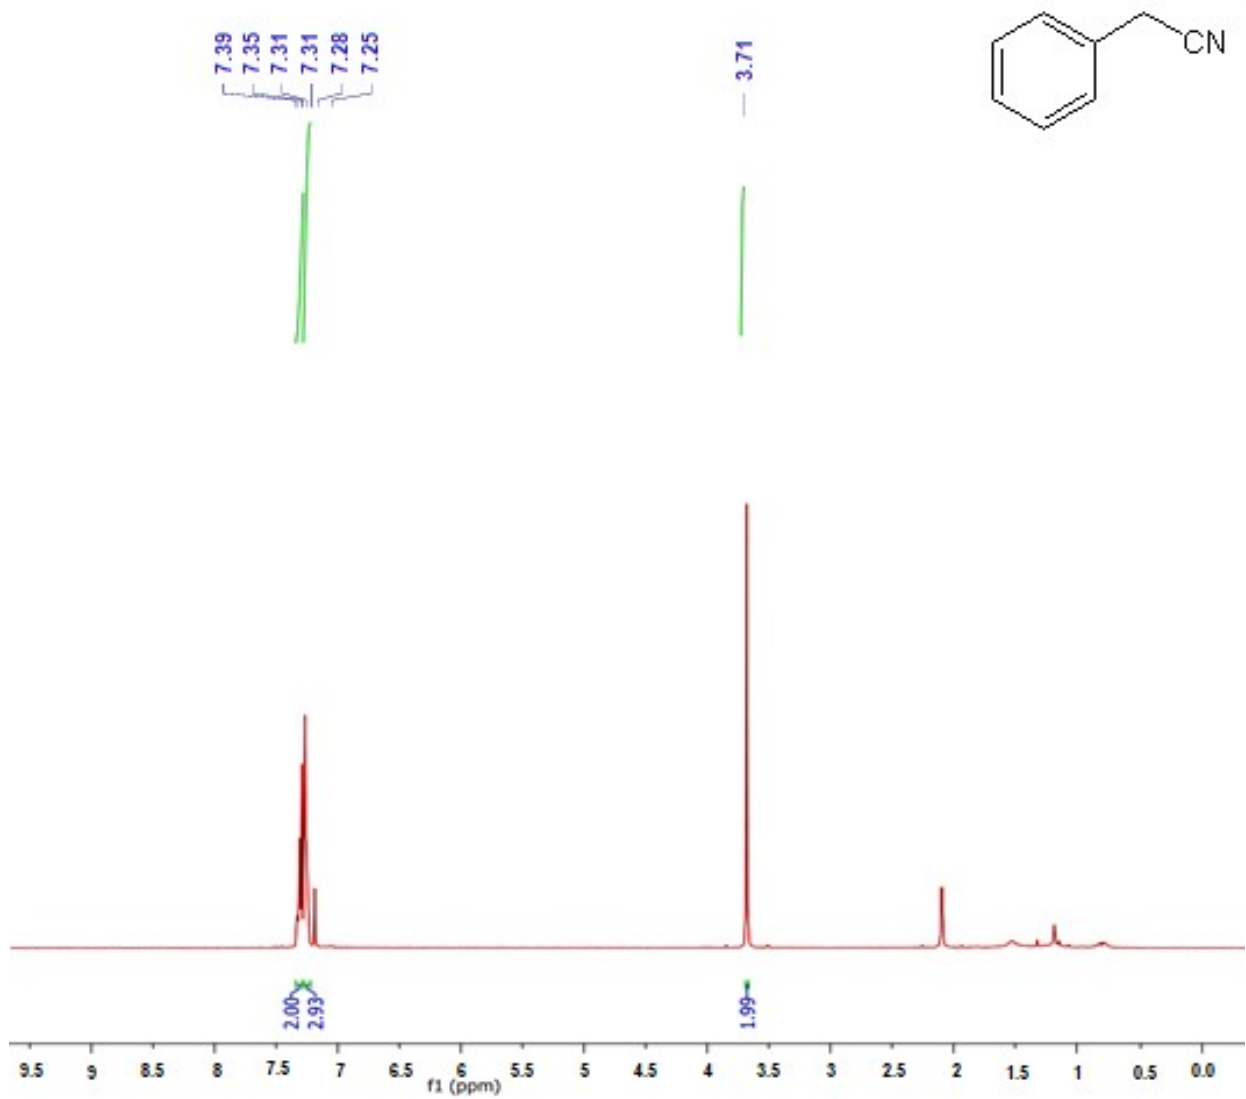



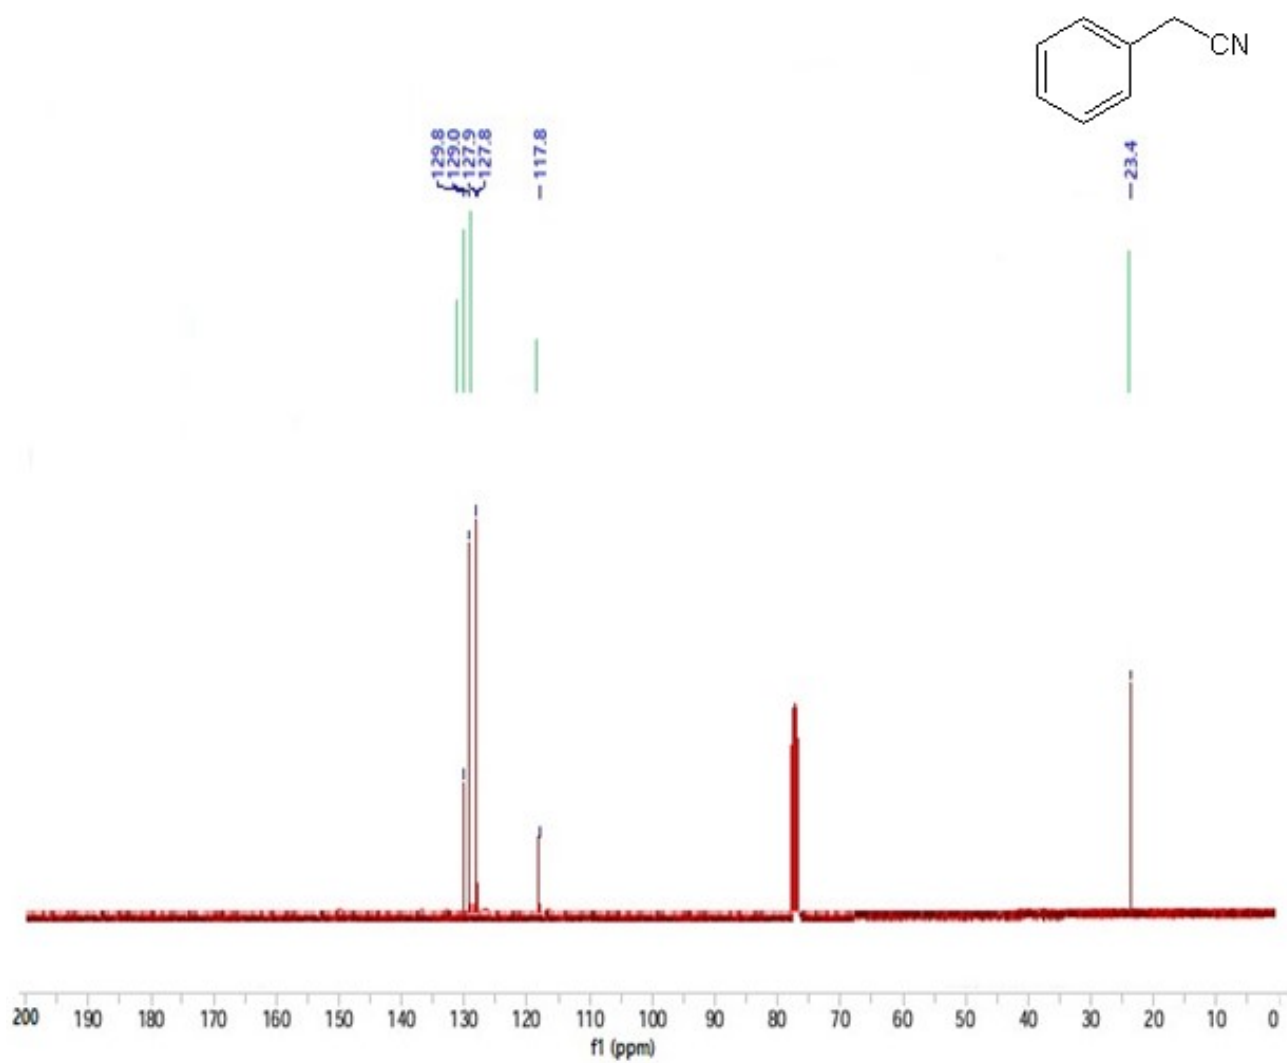

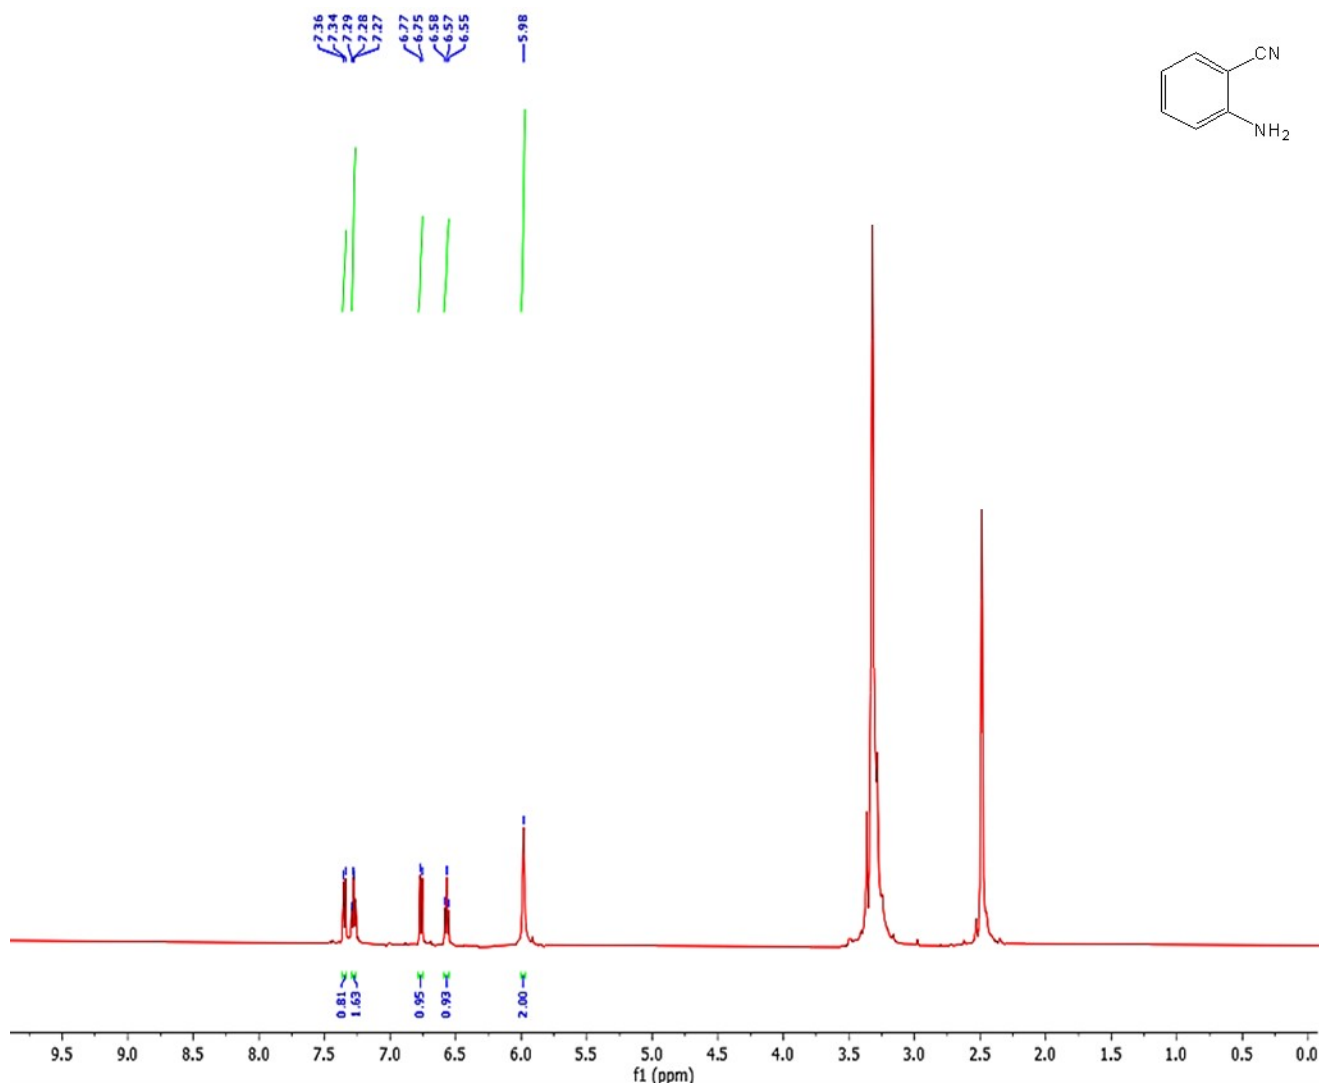

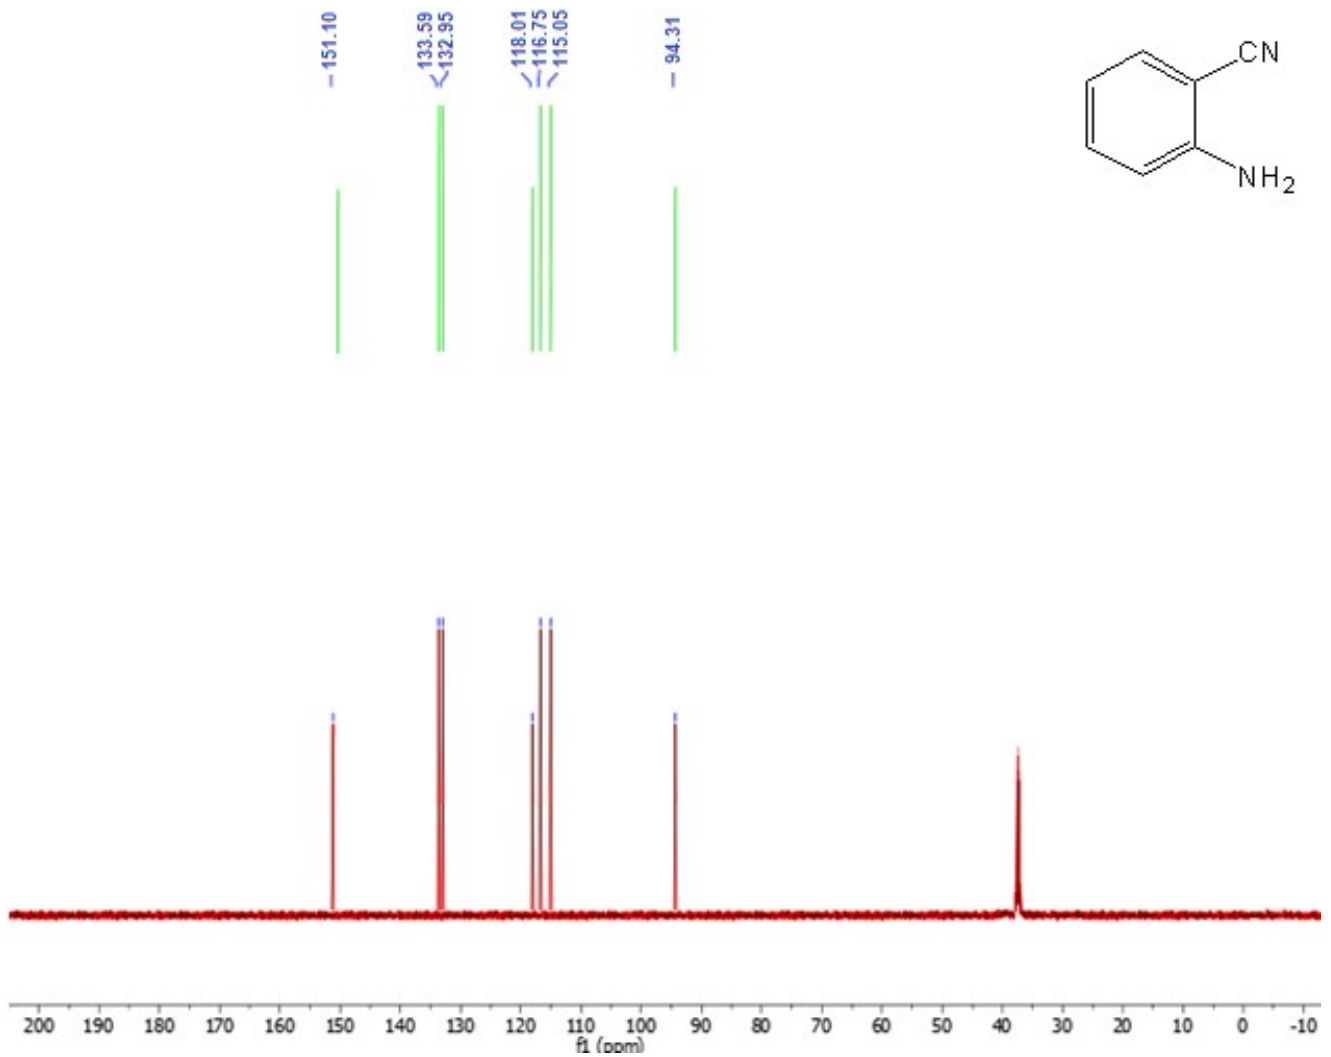

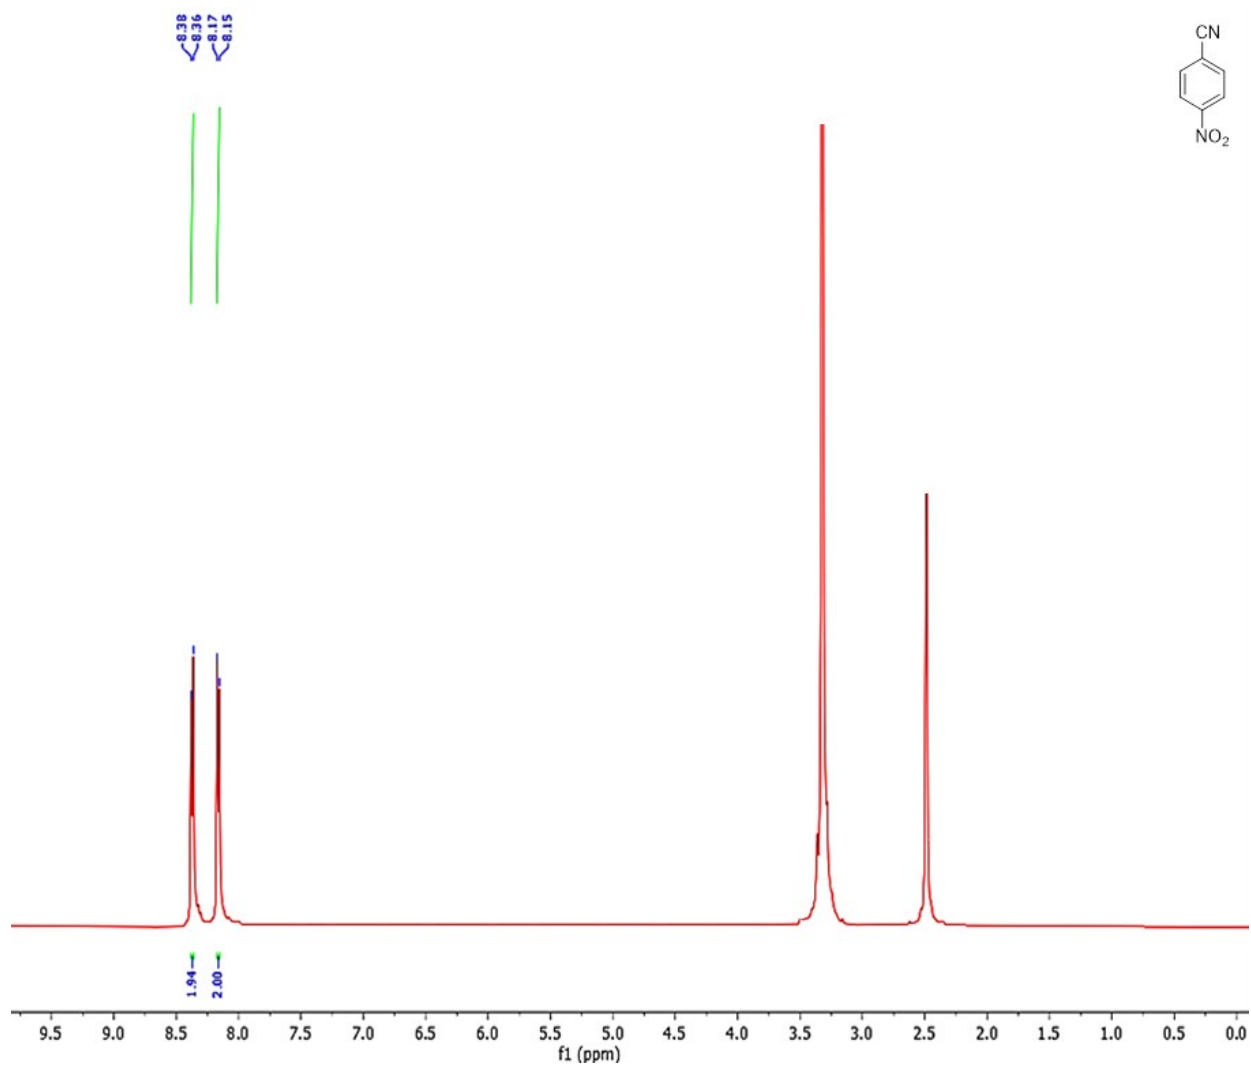

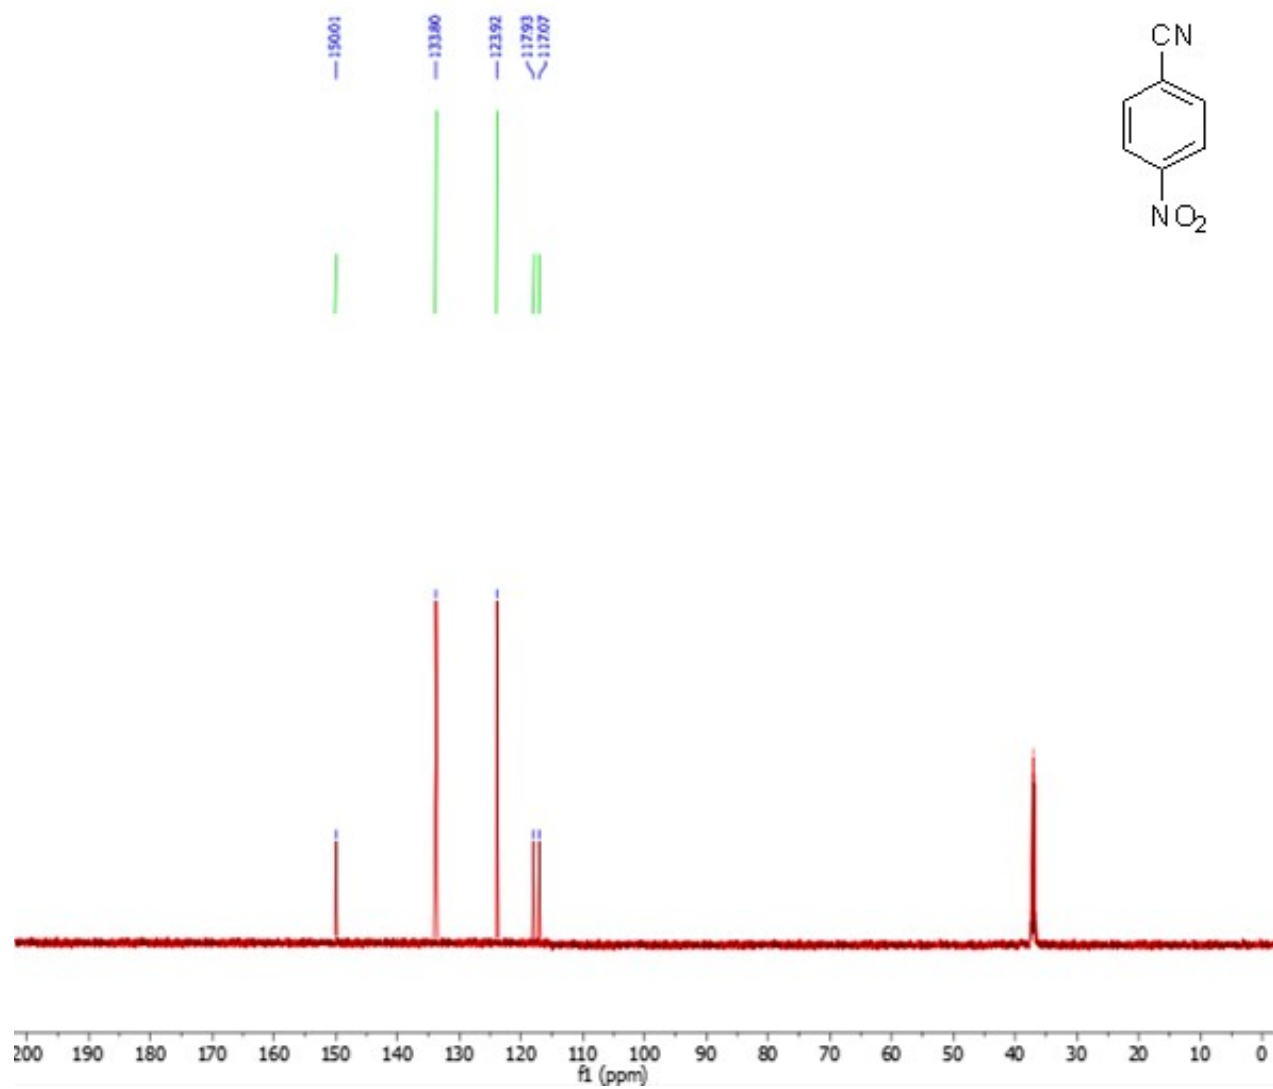

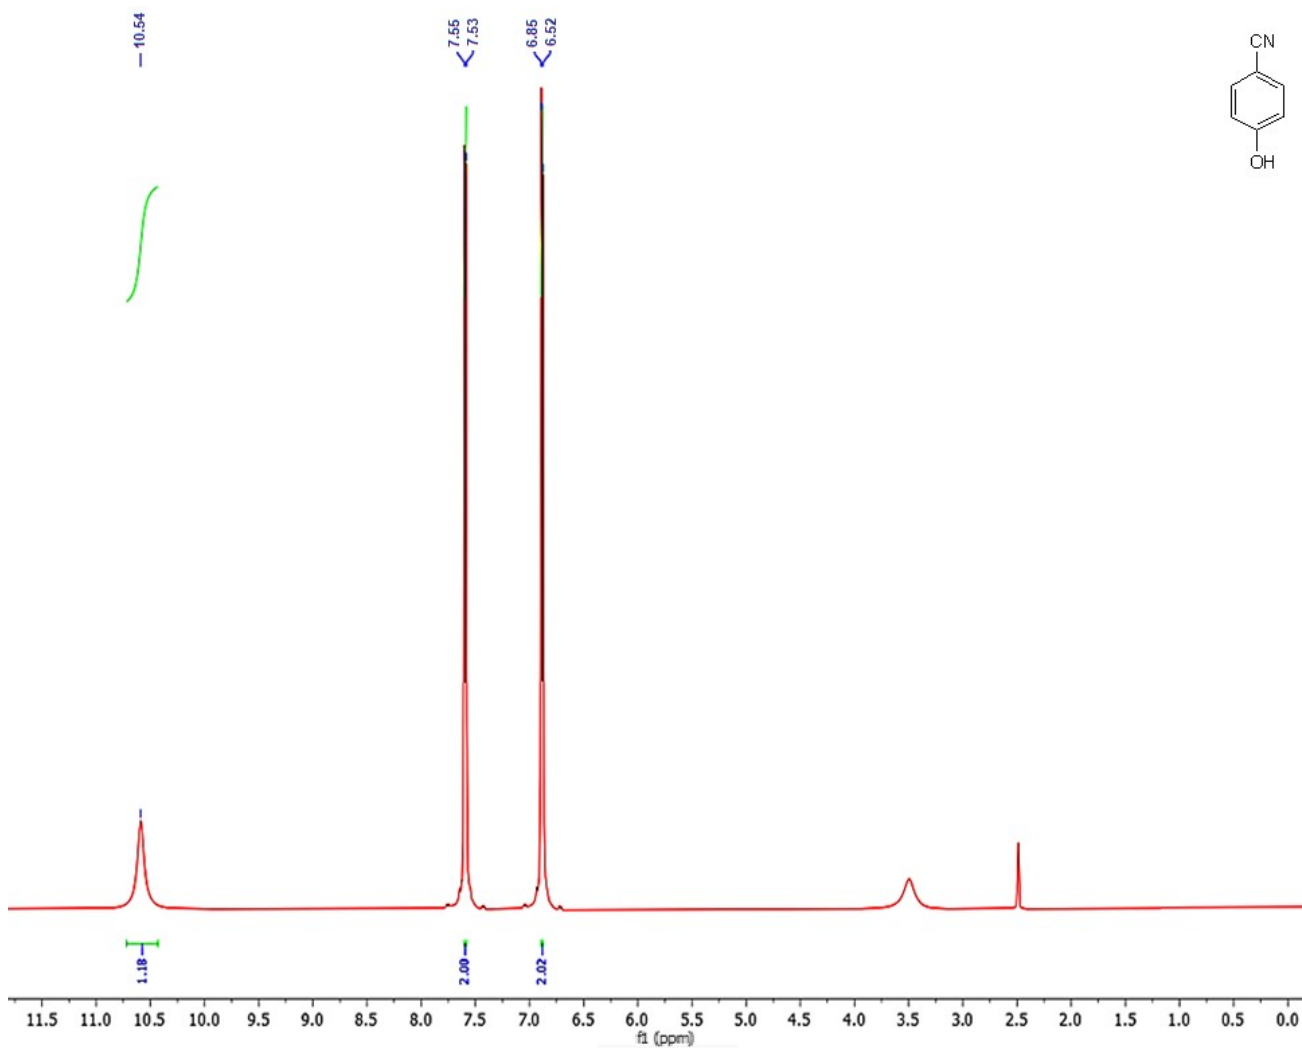

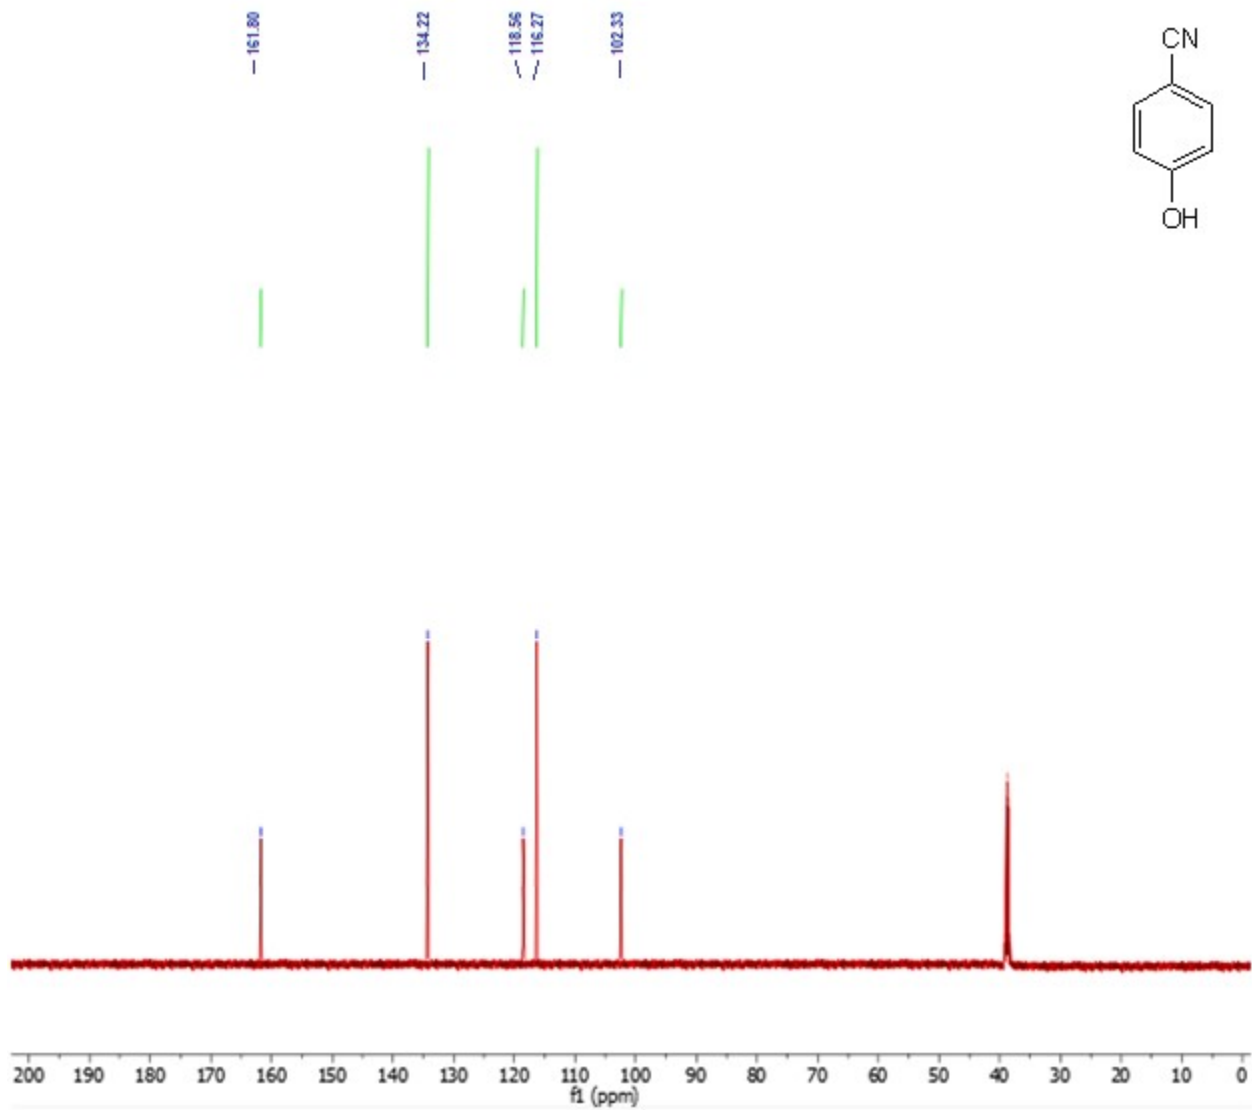

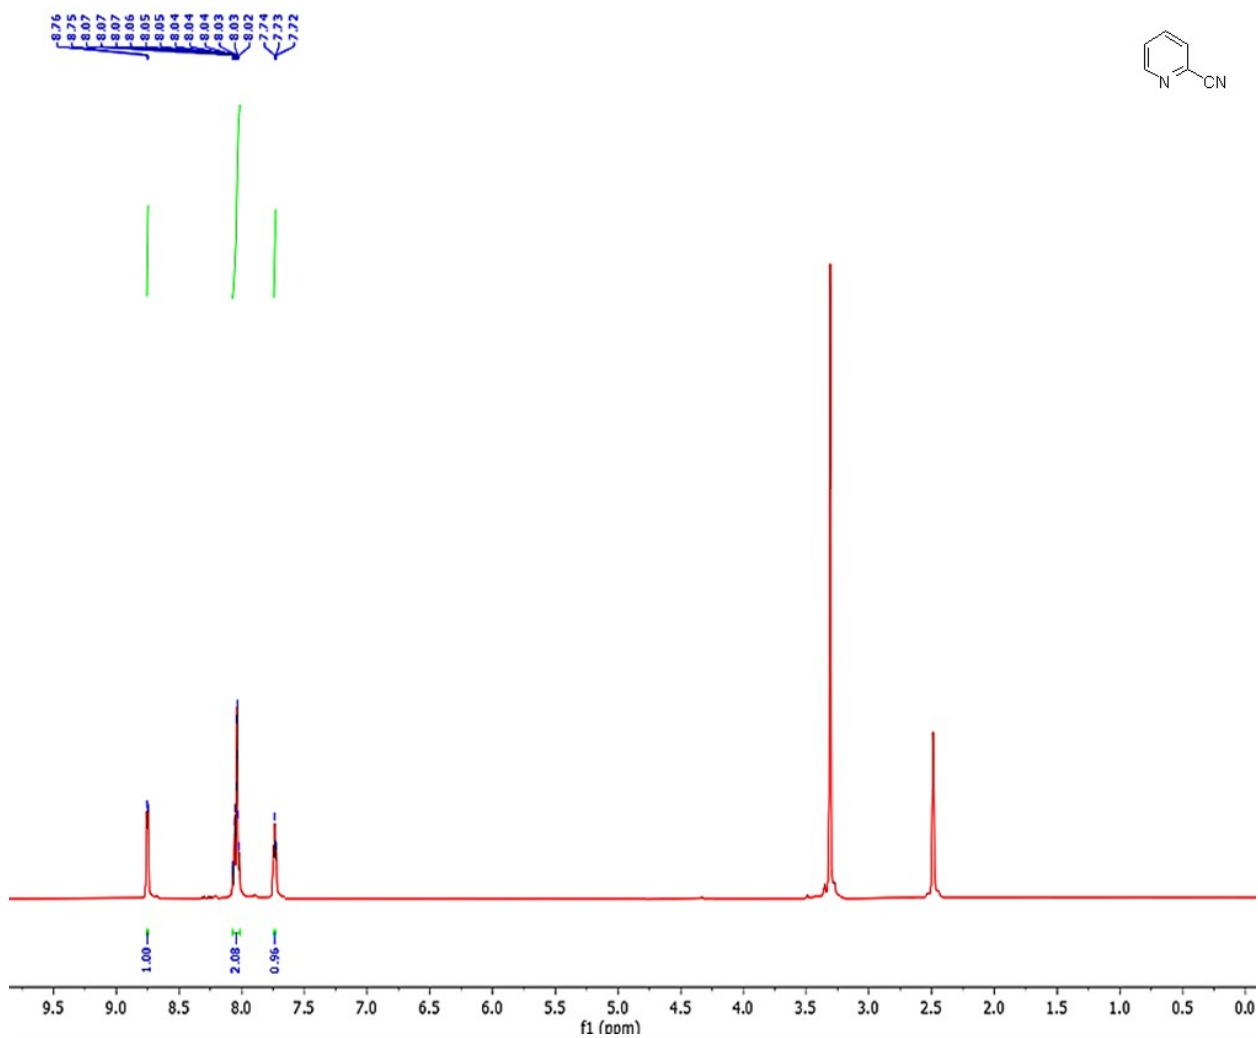



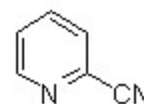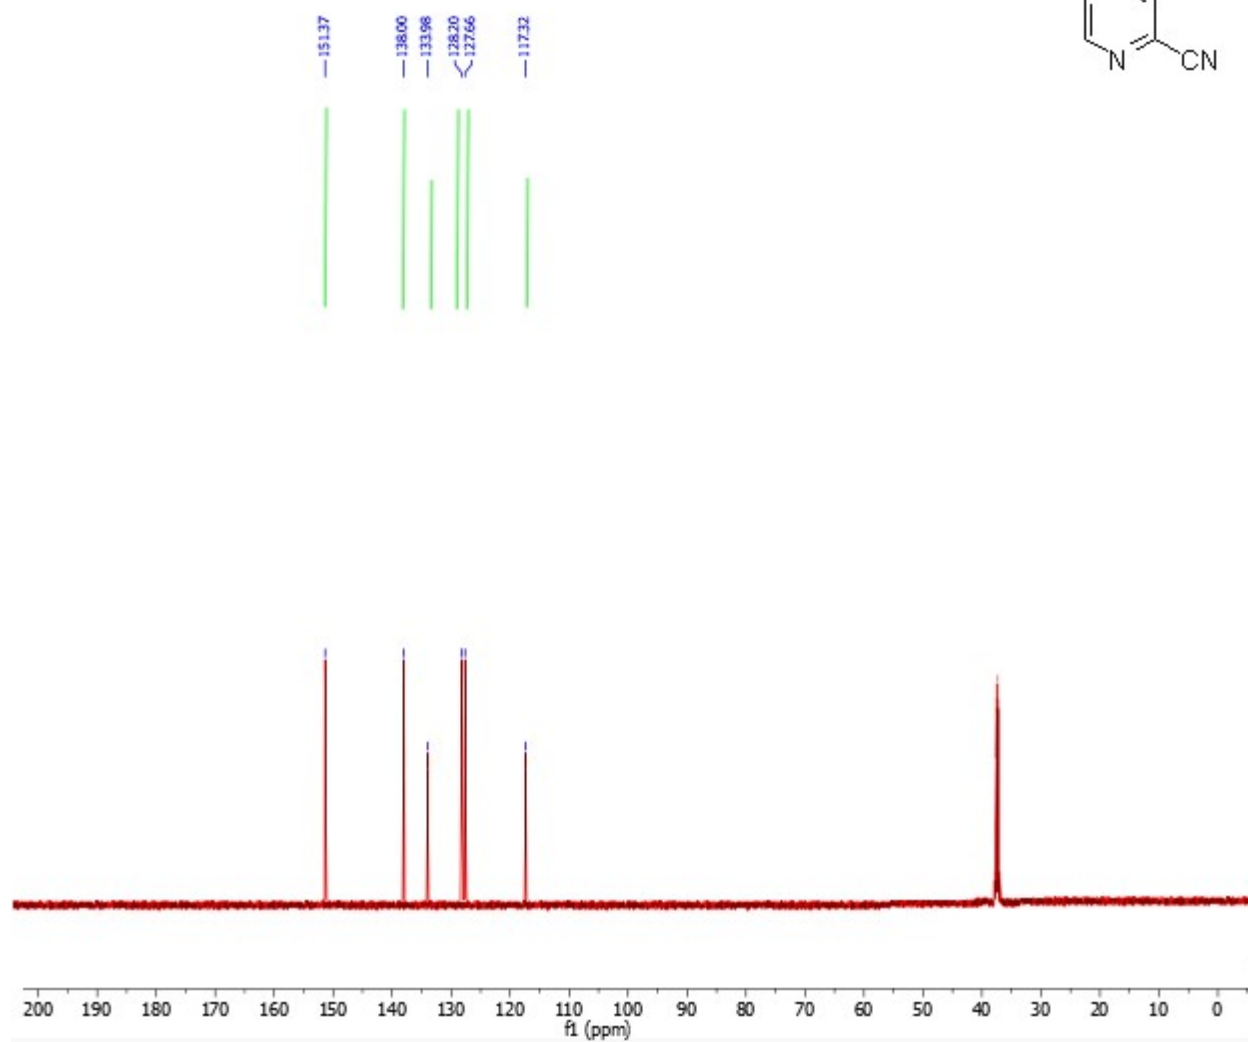

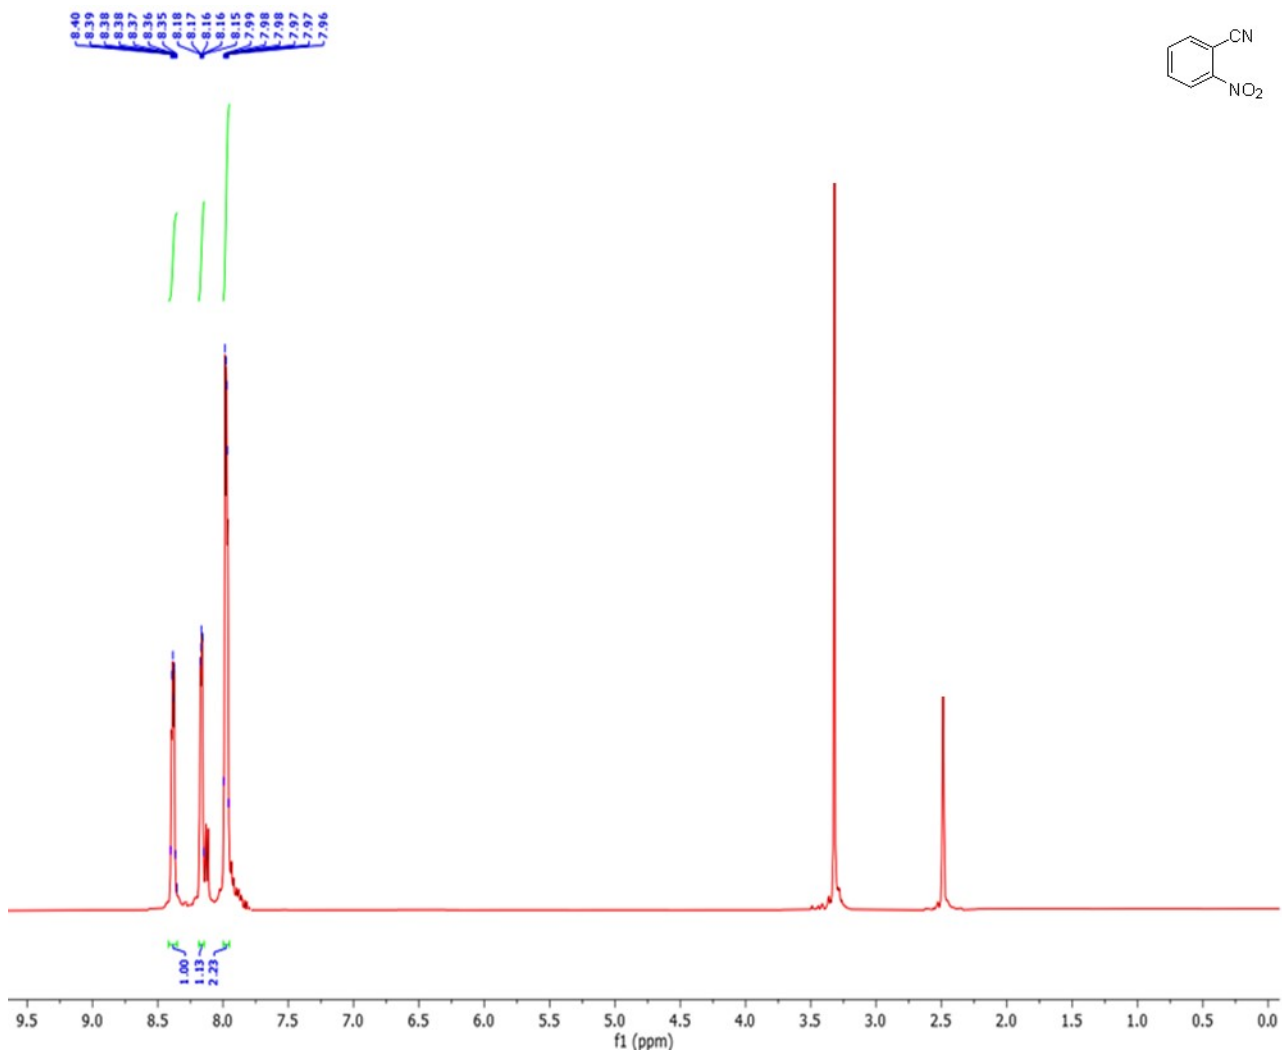

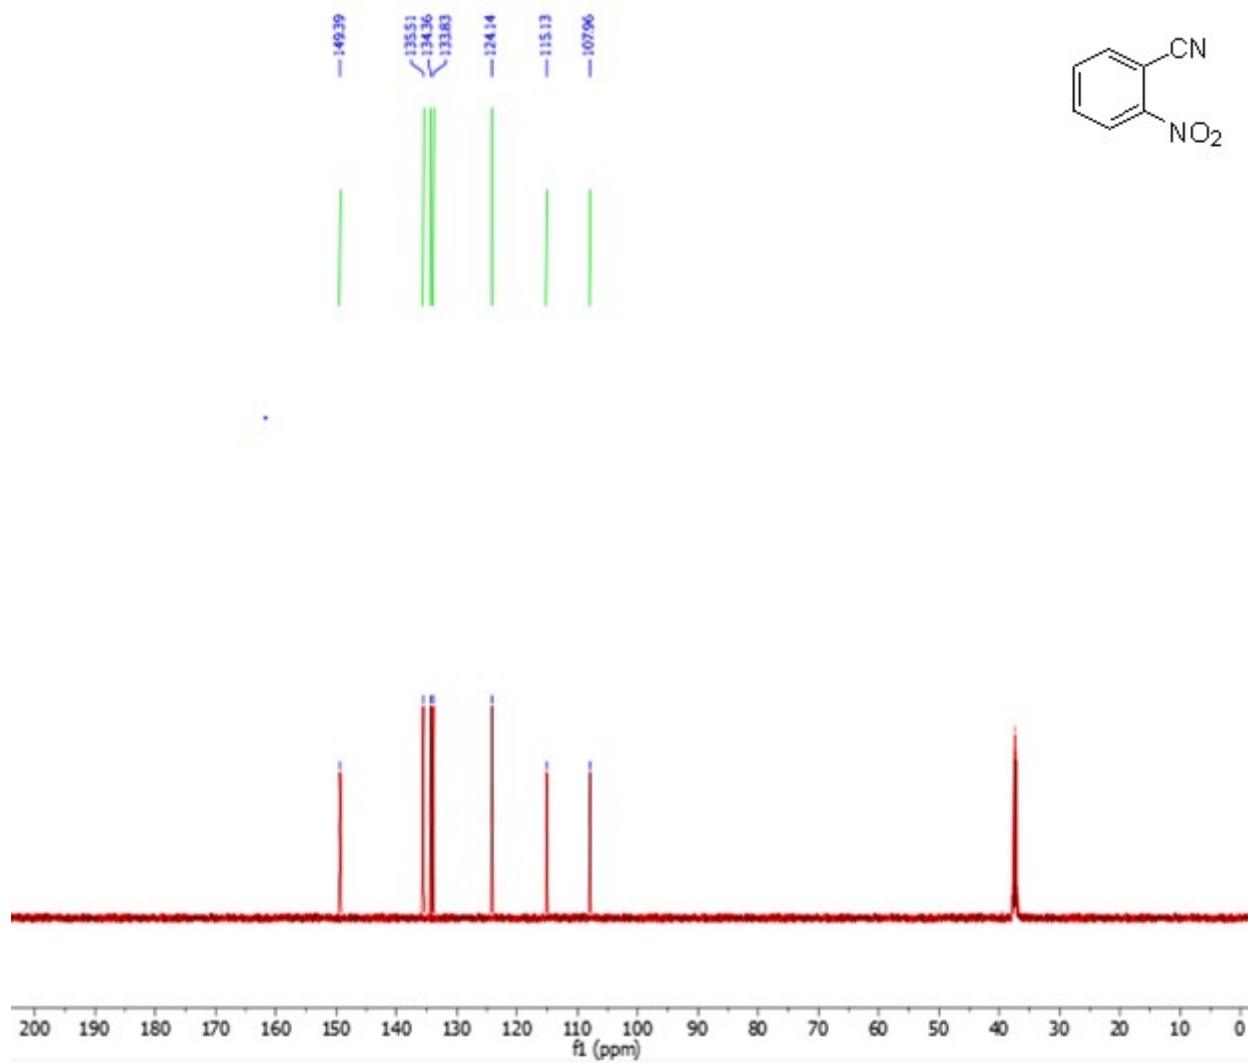

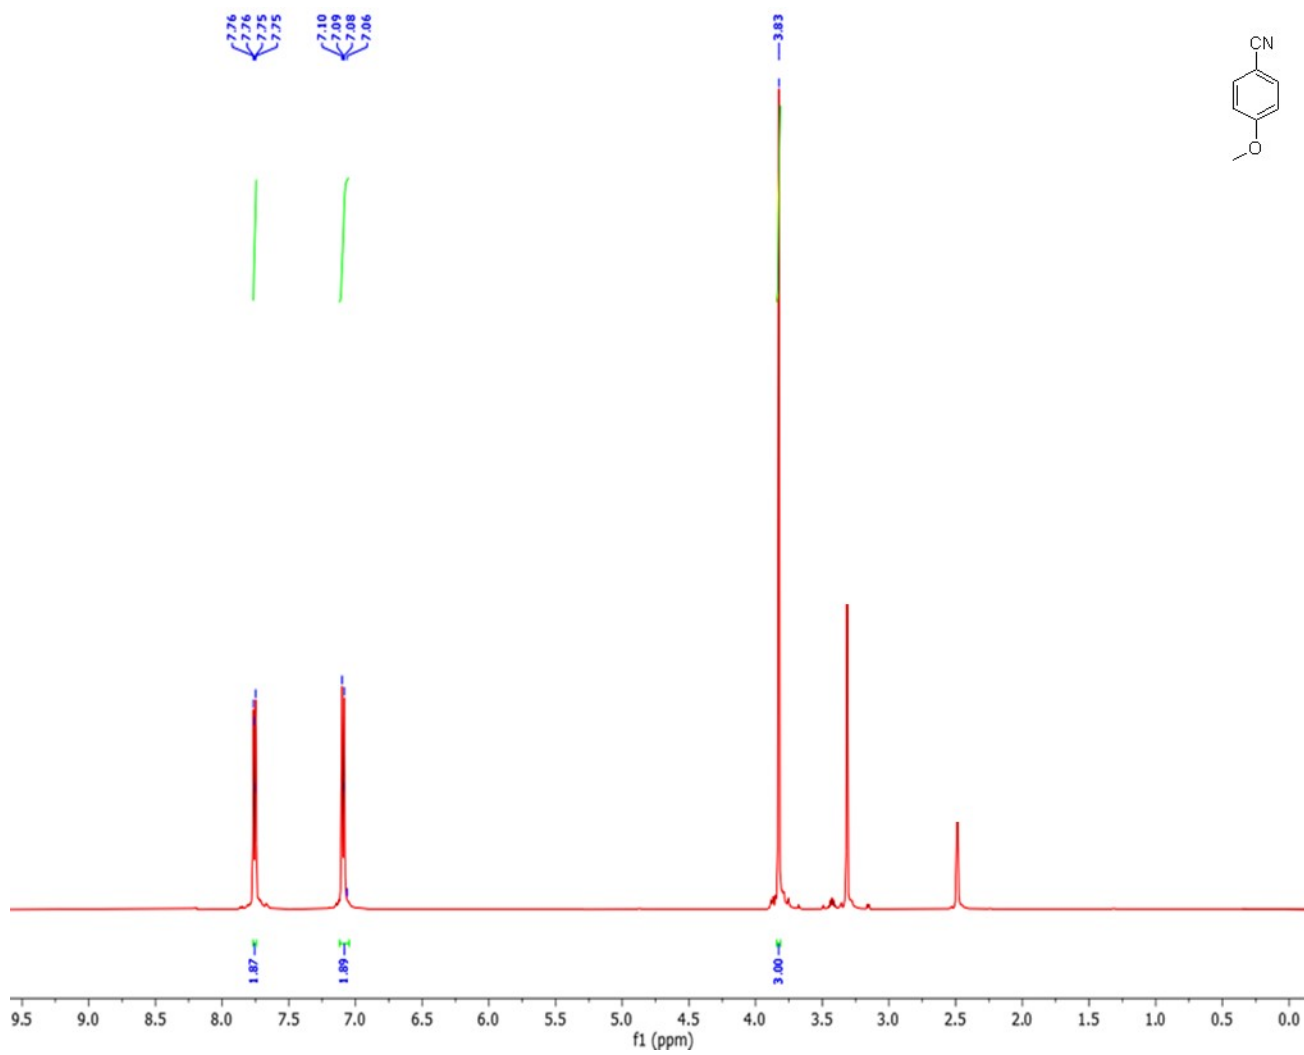

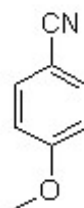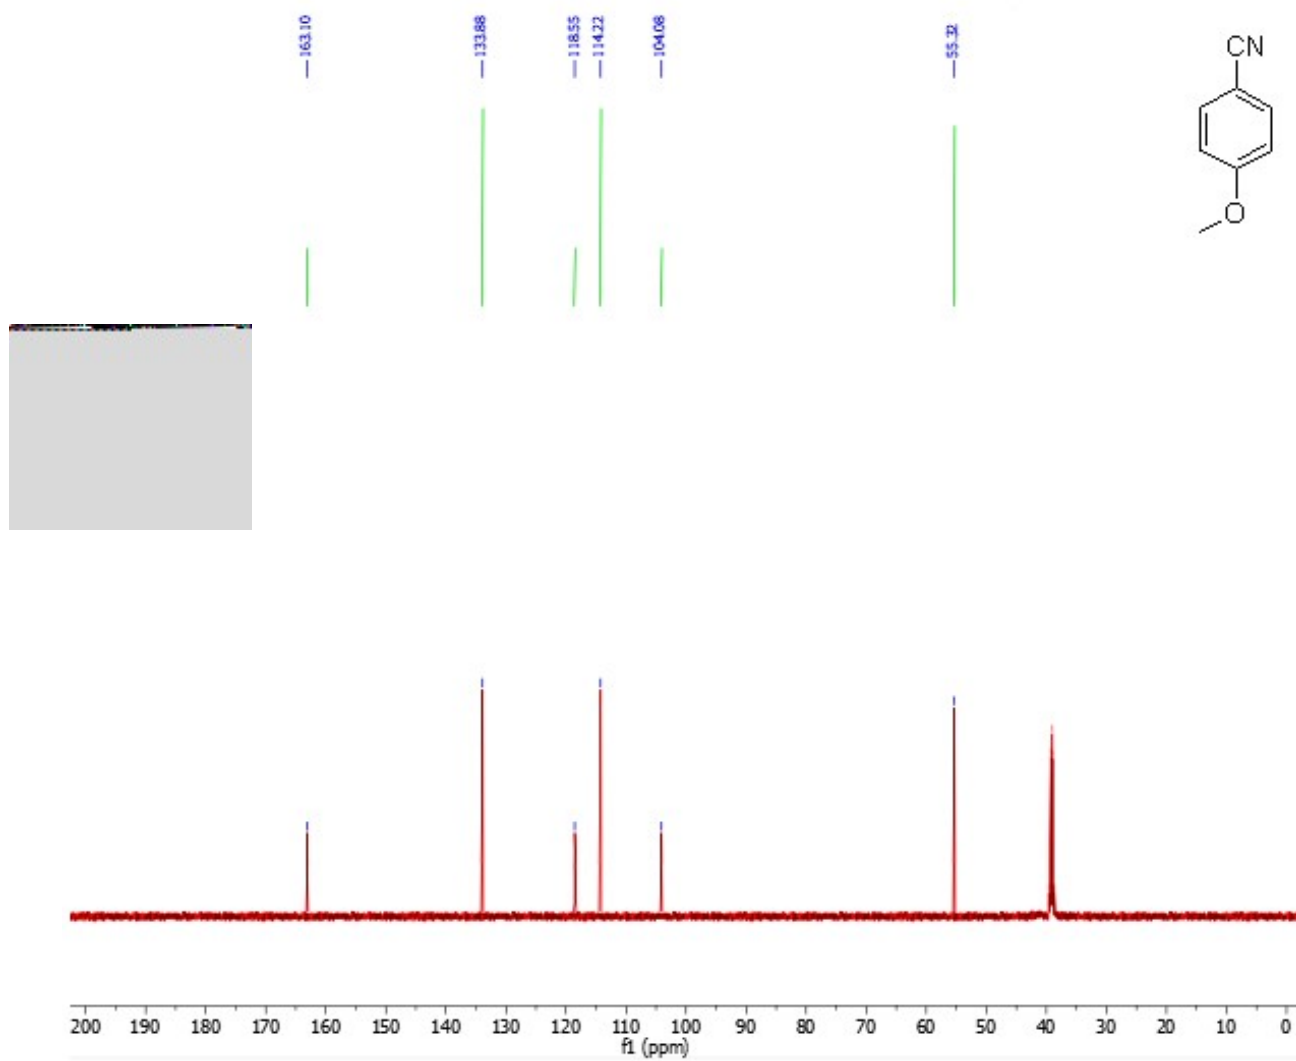

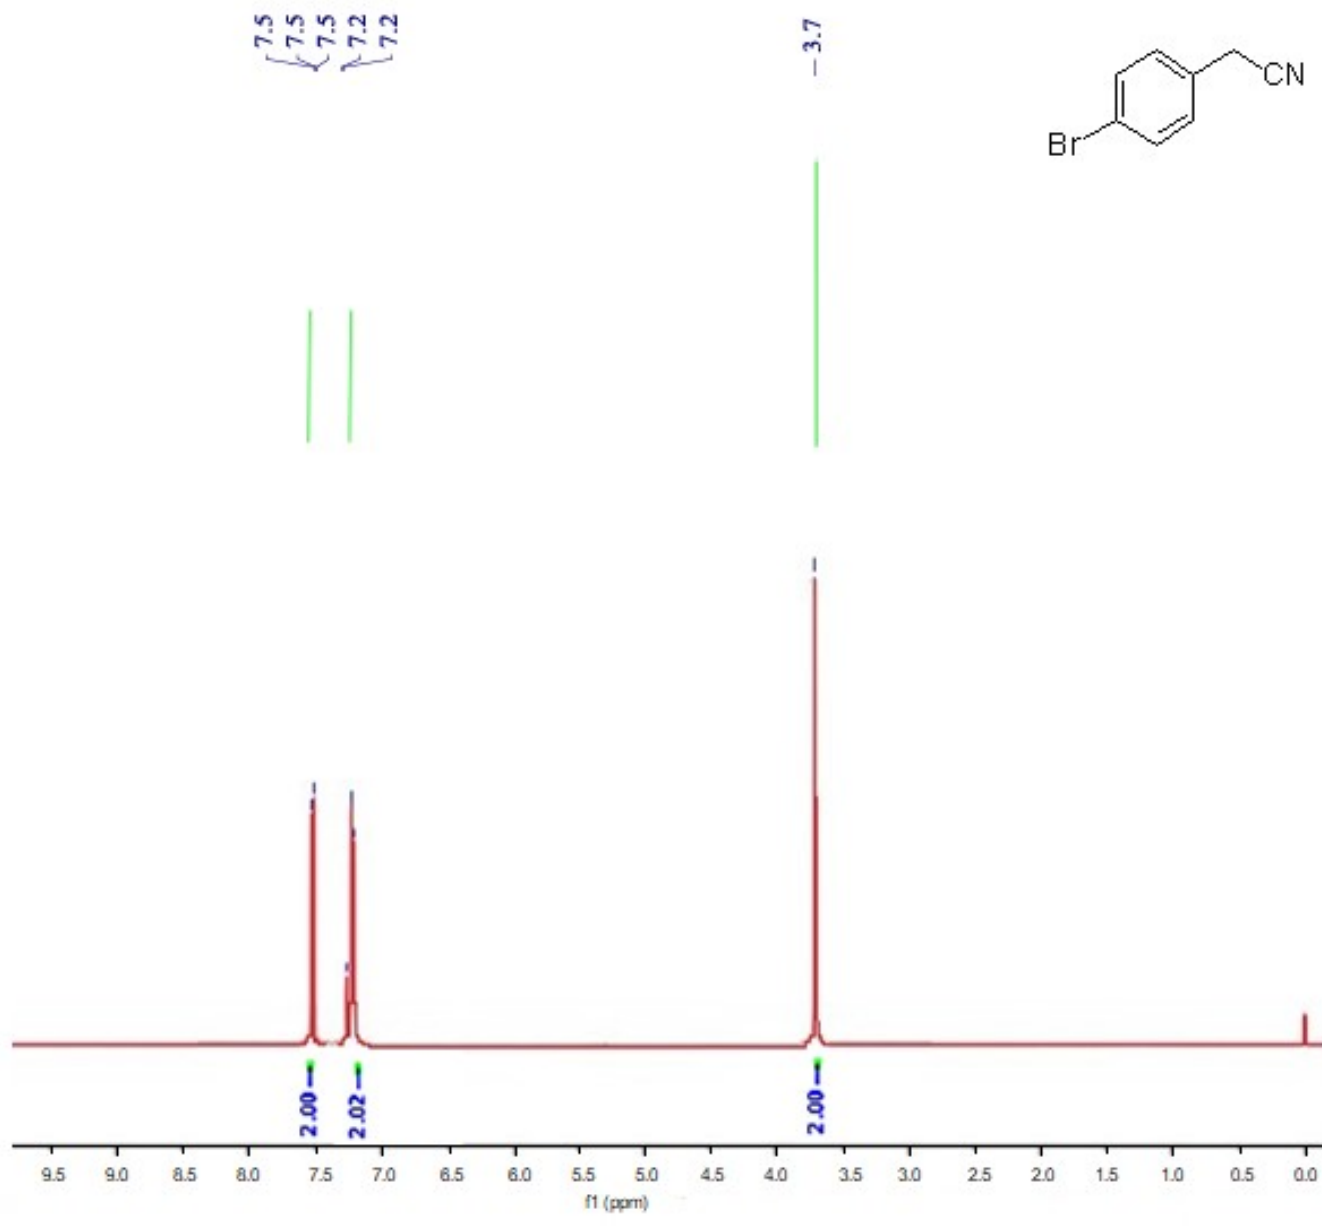

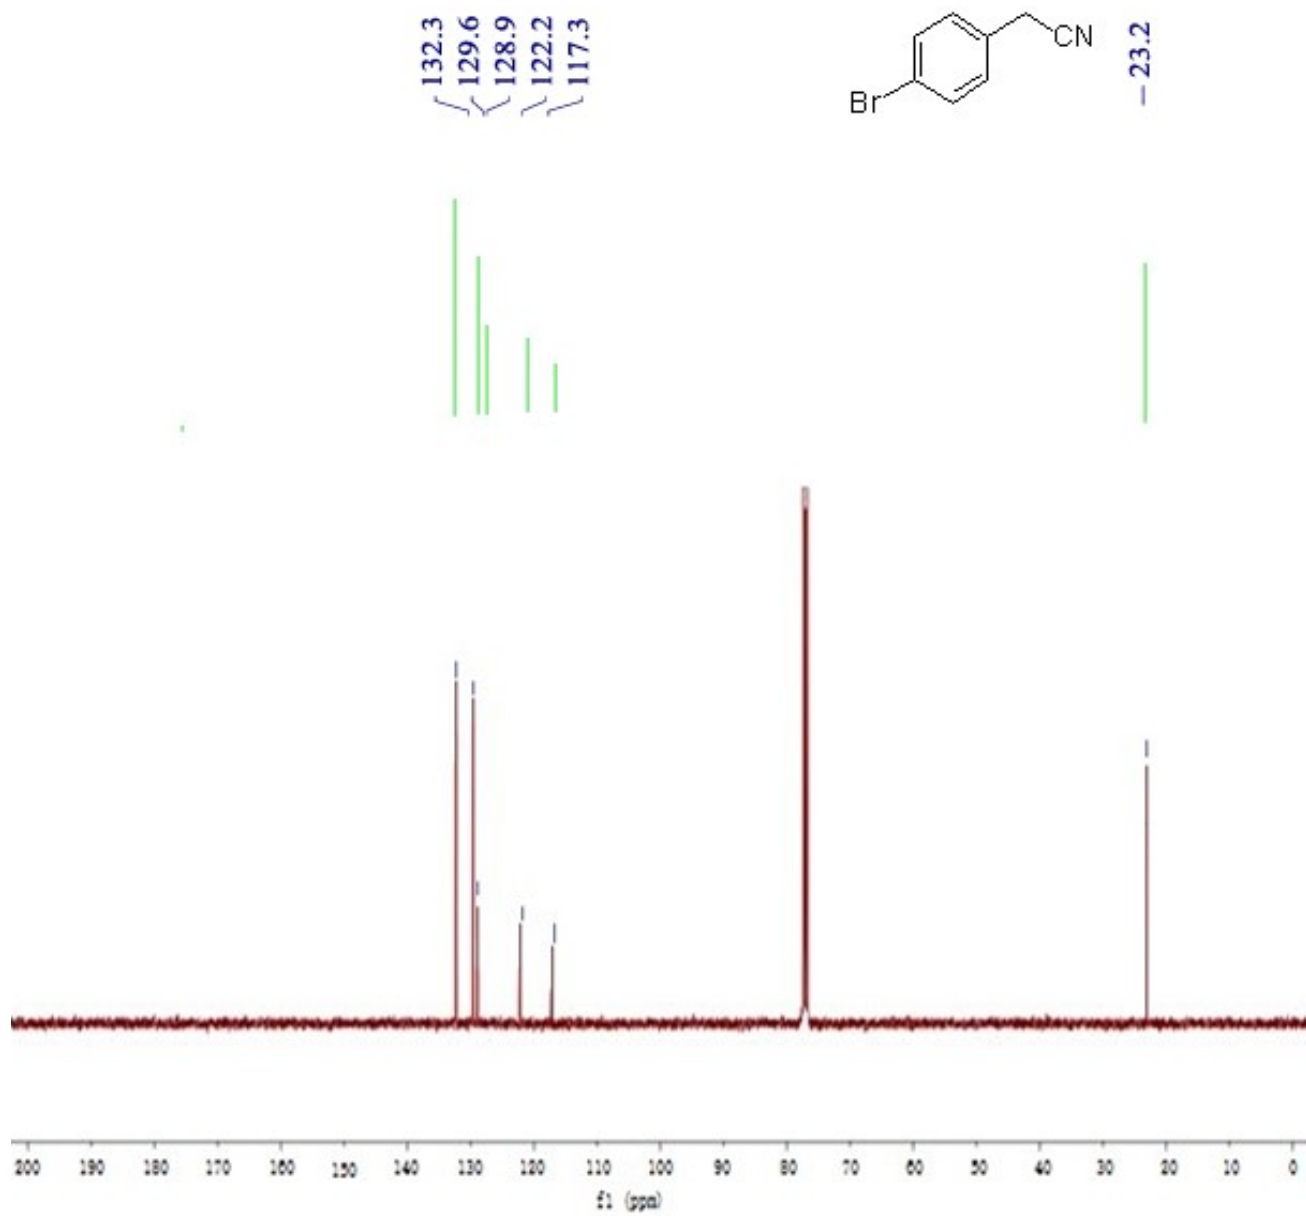

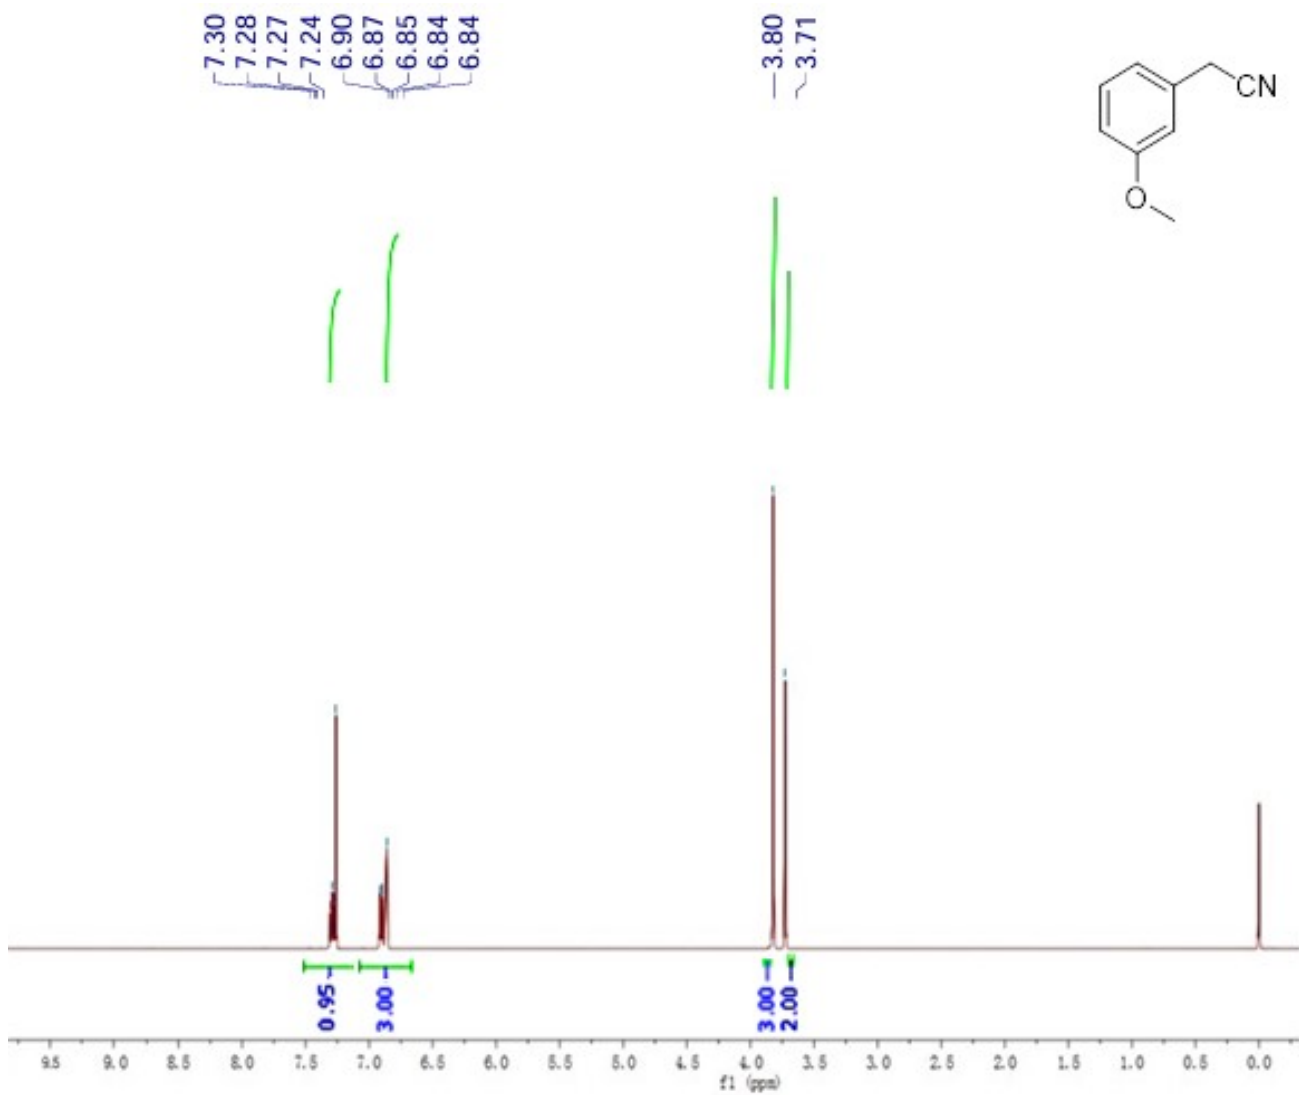



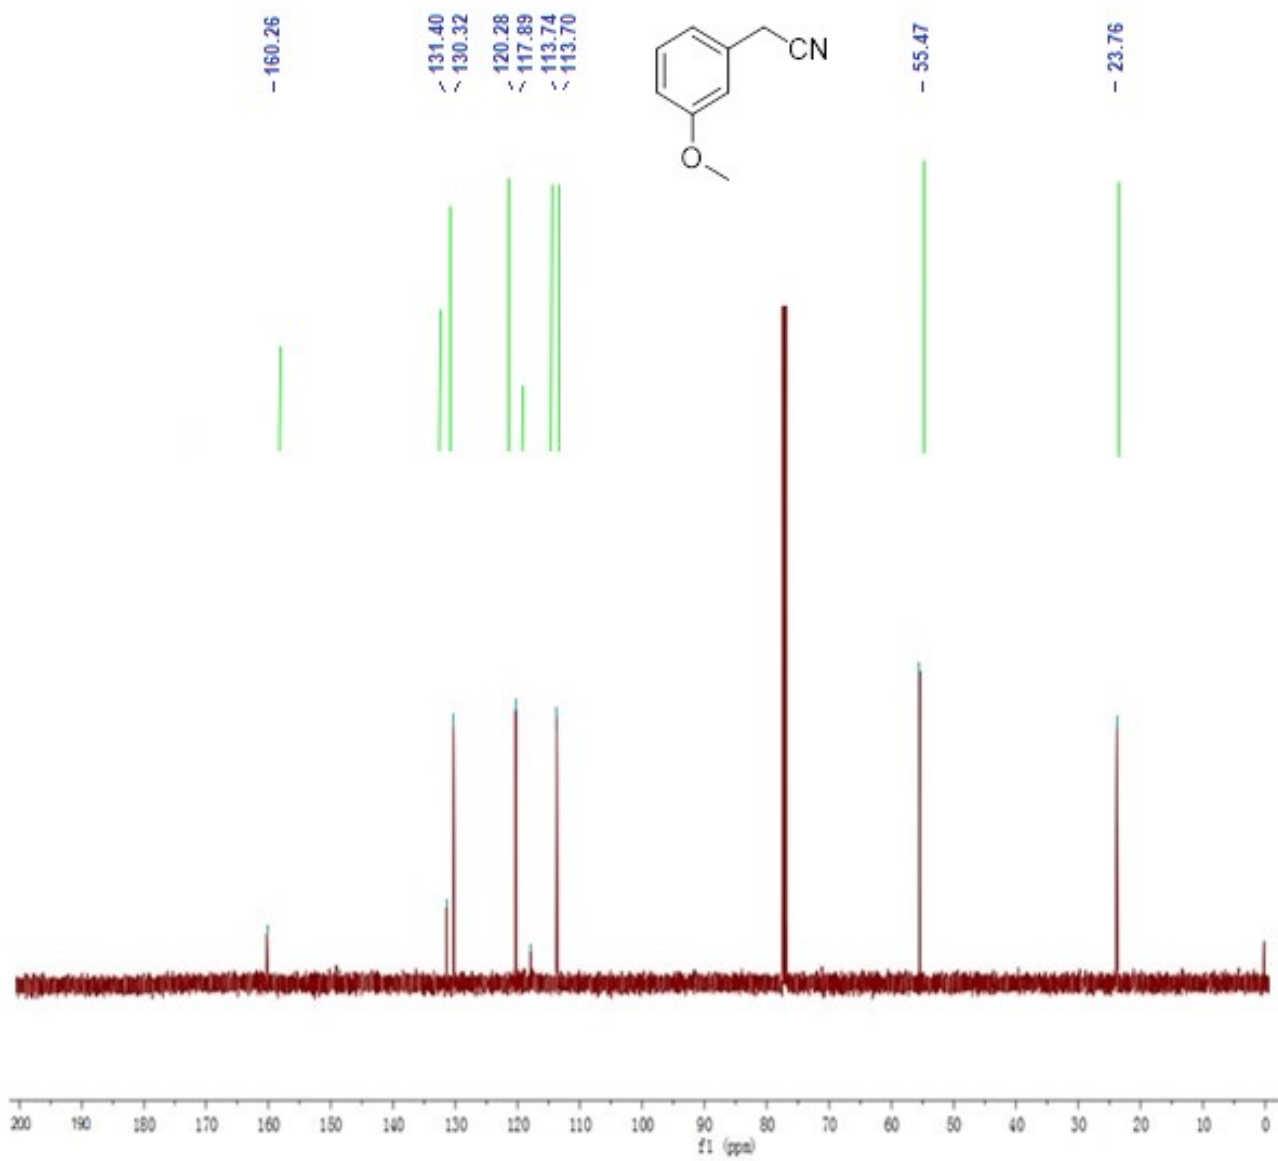

**References:**

Shimojo, Hiroyuki; Moriyama, Katsuhiko; Togo, Hideo, *Synthesis*, 2013, 45, 2164.

Dighe, Shashikant U.; Chowdhury, Deepan; Batra, Sanjay, *Advanced Synthesis and Catalysis*, 2014, 356, 3892 – 3896.

Han, Min Su; Jang, Mingyeong; Lim, Taeho; Park, Byoung Yong, *Journal of Organic Chemistry*, 2022, 87, 910 – 919.

Xu, Da Peng; Xiong, Meilu; Kazem nejadi, Milad, *RSC Advances*, 2021, 11, 21, 12484 – 12499.
